# Supplementary material
Source: Springer Nature journal article supplement (https://www.springermedizin.de/resource/supplementary/13024_2011_351_MOESM8_ESM.pdf/9643756)

**A**

Dopamine (ng/mg)

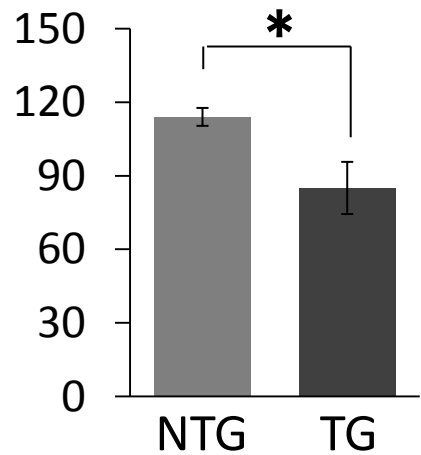

DOPAC (ng/mg)

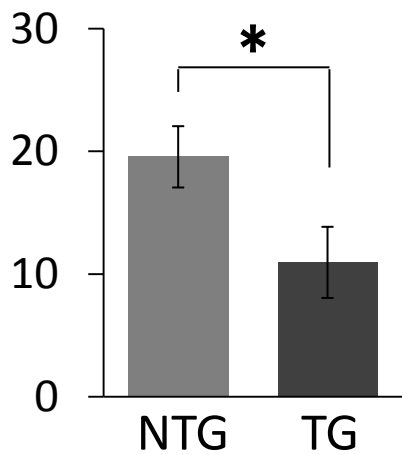

HVA (ng/mg)

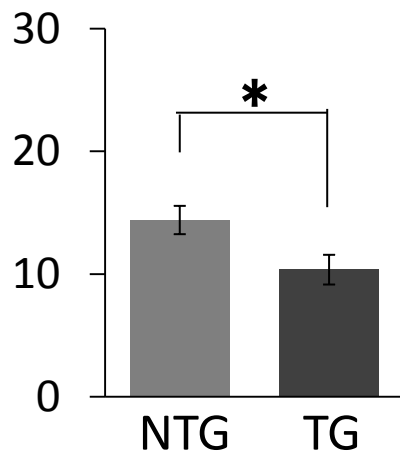**B**

TH activity(% of control)

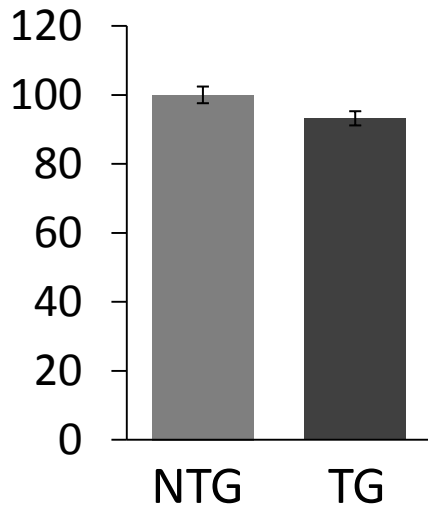

Supplement: MOESM8 [file 9643756]
